# Supplementary material
Source: publisher figshare collection journal article supplement (https://gsajournals.figshare.com/ndownloader/files/22007661)
Supplement: Supplementary file 1 [file 22007661]

## Sheet: Sheet1
Table S2. Genome assemblies analyzed in this study
Species	Isolate	Reference
P. megakarya	Pm1,Pm4 and Pm15	This study
P. palmivora	Pp2, Pp3 and Pp15	This study
P. capsici	LT1534	Lamour et al (2012)
P. cinamomi	var cinnamomi	JGI
P. infestans	T30-4	Haas et al (2009)
P. ramorum	ASM14973v1	Tyler et al (2006)
P. sojae	P6497	Tyler et al (2006)
